# Supplementary material
Source: PubMed Central journal article supplement (PMC3494911)
Supplement: 1204557109_pnas.201204557SI.pdf [file 1204557109_pnas.201204557SI.pdf]

# Supporting Information

Molinero et al. 10.1073/pnas.1204557109

## SI Materials and Methods

**Skin Transplantation.** Skin transplantation was performed as previously described (1). Briefly, full-thickness donor flank skin pieces (0.5–1 cm<sup>2</sup>) were positioned on a graft bed prepared on the flank of the recipient. The time point of rejection was defined as the complete necrosis of the graft.

**IL-17 ELISpot.** ELISpot assays were performed as described (1). Briefly, ImmunoSpot M200 plates (Cellular Technology) were coated overnight with 1/250 of anti-IL-17A (clone TC11-18H10; BD Biosciences) capture antibodies in sterile PBS. The plates were blocked for 1 h with sterile PBS 10% (vol/vol) FBS and washed three times with sterile PBS. One million splenocytes from C57BL/6, CARMA1-KO, or IκBαΔN-Tg mice, immunized with MOG<sub>35–55</sub> peptide 14–20 d before, were plated in complete DMEM with 10 μg/mL of MOG<sub>35–55</sub> or OVA<sub>323–339</sub> peptide. Subsequently plates were incubated at 37 °C, 7% (vol/vol) CO<sub>2</sub> for 16 h. After washing with PBS, 1/500 of biotin-labeled anti-IL-17A detection antibody (clone TC11-8H4.1; BD Biosciences) was added for 2 h at 22 °C. The plate-bound secondary antibody was then visualized by adding 1/2,000 streptavidin–horseradish peroxidase (Bio-Rad) and 3-amino-9-ethylcarbazole substrate (Sigma). Image analysis of ELISpot assays was performed with the ImmunoSpot Analysis software after scanning the plates with an ImmunoSpot analyzer (Cellular Technologies).

**IFNγ ELISpots.** One million splenocytes from WT or CARMA1-KO mice transplanted 32 d prior with BALB/c skin, were stimulated for 18 h with irradiated B6 (syngeneic) or BALB/c (allogeneic) splenocytes (4 × 10<sup>5</sup> per well). Alternatively, one million splenocytes from C57BL/6 or IκBαΔN-Tg mice immunized with MOG<sub>35–55</sub> peptide 14–20 d before were plated in complete DMEM with 10 μg/mL of MOG<sub>35–55</sub> or OVA<sub>323–339</sub> peptide. The ELISpot assay was conducted according to manufacturer instructions (BD Biosciences), and the numbers of IFN-γ-producing spots per well were calculated using the ImmunoSpot analyzer (CTL Analyzers).

**Dendritic Cell Purification and Activation.** Purification of splenic CD11c<sup>+</sup> cells was performed with EasySep Mouse CD11c Positive Selection kit (StemCell) from splenocytes of WT and CARMA1-KO mice following manufacturer instructions. Purity was routinely >95%. Cells were stimulated with 1 μg/mL lipopolysaccharides from *Escherichia coli* 026:B6 (Sigma) for 24 h, washed, pulsed for 2 h with 2 μg/mL of ovalbumin peptide OVA<sub>323–339</sub>, washed, and then cultured in the presence of purified OT-II CD4 T cells.

**Flow Cytometry.** To assess intracellular cytokine expression, differentiated T cells were restimulated for 4 h with 150 ng/mL PMA and 500 ng/mL ionomycin (Sigma), in the presence of 10 μg/mL brefeldin A (Biolegend). Cells were stained with the fixable viability dye Live Aqua (Invitrogen) for 20 min at room temperature, before fixation with 1% (vol/vol) paraformaldehyde in FACS buffer [0.1% (wt/vol) BSA, 0.1% (wt/vol) Na<sub>2</sub>S<sub>2</sub>O<sub>3</sub> in PBS] and permeabilization in intracellular staining (IC) buffer [0.1% (wt/vol) saponin in FACS buffer], and then stained in IC buffer with fluorochrome-conjugated antibodies to Foxp3, IFNγ, IL-17A, and IL-17F, or their respective isotype controls. For the assessment of phosphoproteins, cells were stimulated for 30 min with the indicated cytokines, fixed with 1% (wt/vol) formaldehyde at 37 °C for 10 min, permeabilized with ice-cold 90% (vol/vol)

methanol for 30 min on ice, washed in FACS buffer, and stained with fluorochrome-conjugated antibodies to CD4 and CD44, phospho-STAT3, or phospho-STAT5 in FACS buffer. Alternatively, viability was assessed by staining cells with allophycocyanin-coupled Annexin V and Live Aqua, following the manufacturer's recommendation (BD Biosciences). Proliferation was assessed in CD4 T cells labeled with 2 μM of carboxyfluorescein succinimidyl ester (CFSE; Sigma) or 5 μM Cell Proliferation dye eFluor 670 (eBioscience). Dendritic cells were analyzed using CD11c, CD80, CD86, and MHC II antibodies. All experiments were analyzed in BD LSR Fortessa and LSR II flow cytometers (BD Biosciences). Antibodies were purchased from eBioscience except for all phospho-specific antibodies (BD Biosciences).

**Cytokine ELISAs.** Cells stimulated for 72 h in Th0, Th1, Th2, or Th17 conditions were washed twice with complete medium, and 5 × 10<sup>5</sup> viable cells were restimulated with 50 ng/mL of PMA and 0.5 μg/mL of ionomycin for 24 h. Cytokine production was assessed in supernatants using ELISA kits for IFNγ, IL-17A, and IL-4 ELISAs (BD Biosciences), according to the manufacturer's instructions. Plates were read in a 96-well μQuant spectrophotometer (Bio-Tek Instruments) and data were analyzed using KC4 software (Bio-Tek Instruments) by comparison against a standard curve generated using recombinant cytokines at known concentrations.

**Reverse Transcription and Quantitative Real-Time PCR.** Total RNA was prepared from T cells with the use of RNeasy Plus Mini kit (Qiagen). cDNA was synthesized with iScript cDNA Synthesis kit (Bio-Rad) and the samples diluted in water (1:10). A total volume of 25 μL containing 5 μL cDNA template, 0.3 μM of each primer, and SYBR Green PCR Master mix (Applied Biosystems) was analyzed in triplicate. Gene expression was analyzed with an ABI PRISM 7300 Sequence Detector and ABI Prism Sequence Detection software version 1.9.1 (Applied Biosystems). Reactions were prepared in triplicates and results were normalized by division of the value for the tested gene by that obtained for *Actb* using the standard curve method. Primers used are described in Table S1.

**Generation of MIGR1-CARMA1-ΔID.** Constitutively active CARMA1 in pcDNA3 (provided by Joel Pomerantz, Johns Hopkins University, Baltimore) was cut with XbaI, site filled with Klenow polymerase, and cut again with NotI. The retroviral vector MIGR1-poly, coding for eGFP after an internal ribosome entry site (IRES) region (provided by Malay Mandal, University of Chicago), was cut with HpaI and NotI and subsequently linked to the CARMA1-ΔID fragment. Cells were transformed into *E. coli* competent cells. The fidelity of the construct was verified by DNA sequencing.

**Retrovirus Production and Transduction.** Retrovirus packaging PlatE cells were transfected with either MIGR1-eGFP, MIGR1-CARMA1-ΔID-eGFP, MIGR1-hCD2, or MIGR1-RORα-hCD2 (the latter two constructs provided by Chen Dong, University of Texas MD Anderson Cancer Center, Houston) using a calcium chloride transfection protocol (Invitrogen) according to manufacturer instructions. For retroviral transduction, WT and CARMA1-KO CD4<sup>+</sup> naïve T cells were stimulated for 24 h in the presence of rhIL-2 (10 units/mL) and plate bound anti-CD3 (5 μg/mL) and anti-CD28 (1 μg/mL), transduced by spin infection (670 × g for 99 min at 37 °C) with supernatant of 48 h



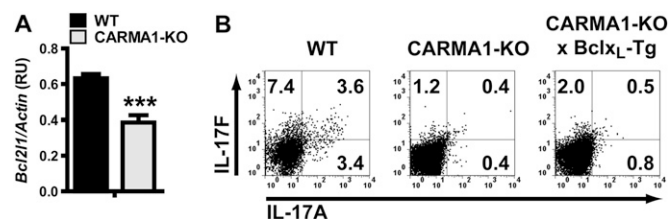

**Fig. S2.** CARMA1 is required for Bcl-x<sub>L</sub> up-regulation, but overexpression of Bcl-x<sub>L</sub> does not restore IL-17 production. (A) *Bcl2l1* mRNA levels were assessed by RT-qPCR in WT and CARMA1-KO CD4<sup>+</sup>CD25<sup>-</sup>CD44<sup>lo</sup> cells stimulated under Th17 conditions for 72 h and normalized to levels of *Actb* gene expression. RU, relative units. (B) IL-17A and IL-17F expression was assessed by intracellular flow cytometry in WT, CARMA1-KO, and CARMA1-KO × Bcl-x<sub>L</sub>-Tg CD4<sup>+</sup>CD25<sup>-</sup>CD44<sup>lo</sup> cells stimulated under Th17 conditions for 72 h. Experiments were performed at least twice.

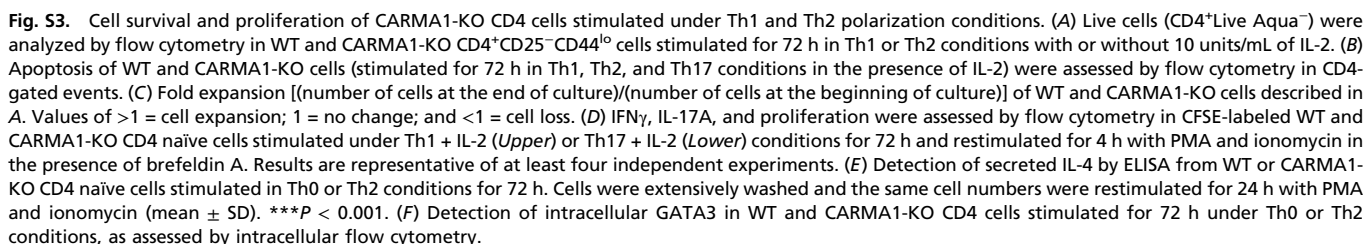

**Fig. 5A.** T cells need CARMA1 for experimental autoimmune encephalomyelitis but not skin allograft rejection. (A) Surface expression of CCR6 in WT (solid line) and CARMA1-KO (dashed line) cells stimulated for 72 h under Th17 conditions as assessed by flow cytometry. IC, isotype control (gray-filled histogram). (B) Detection of IL-17A and IFN $\gamma$  in CD4<sup>+</sup> CNS-infiltrating cells by intracellular staining. (C) Expression of CD80, CD86, and MHC class II in 24 h LPS-stimulated WT and CARMA1-KO CD11c<sup>+</sup> dendritic cells (DCs). (D) Proliferation of Proliferation Dye 670-labeled OT-II CD4 T cells after 72 h stimulation with LPS-activated WT or CARMA1-KO DCs. (E) BALB/c (H-2<sup>d</sup>) skin allografts were transplanted into fully mismatched C57BL/6 (H-2<sup>b</sup>) WT or CARMA1-KO mice and graft survival was assessed over time. (F) Splenocytes from mice that had rejected their skin grafts were prepared and 10<sup>6</sup> responder cells were cocultured with 4  $\times$  10<sup>5</sup>  $\gamma$ -irradiated syngeneic (C57BL/6) or donor (BALB/c) stimulators. Results represent the mean and SD of triplicates of three different samples.

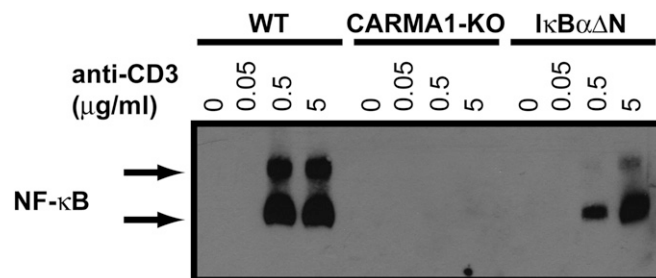

**Fig. S5.** NF- $\kappa$ B activation in WT, CARMA1-KO, and I $\kappa$ B $\alpha$  $\Delta$ N-Tg CD4 T cells. Nuclear extracts of WT, CARMA1-KO, and I $\kappa$ B $\alpha$  $\Delta$ N-Tg CD4<sup>+</sup>CD44<sup>lo</sup> T cells stimulated for 24 h with plate-bound anti-CD28 (1  $\mu$ g/mL) and increasing doses of anti-CD3 (0, 0.05, 0.5, and 5  $\mu$ g/mL) in the presence of IL-2 were subjected to EMSA for detection of NF- $\kappa$ B binding to a biotin-labeled DNA probe containing the NF- $\kappa$ B binding site of the *IL-2* gene.

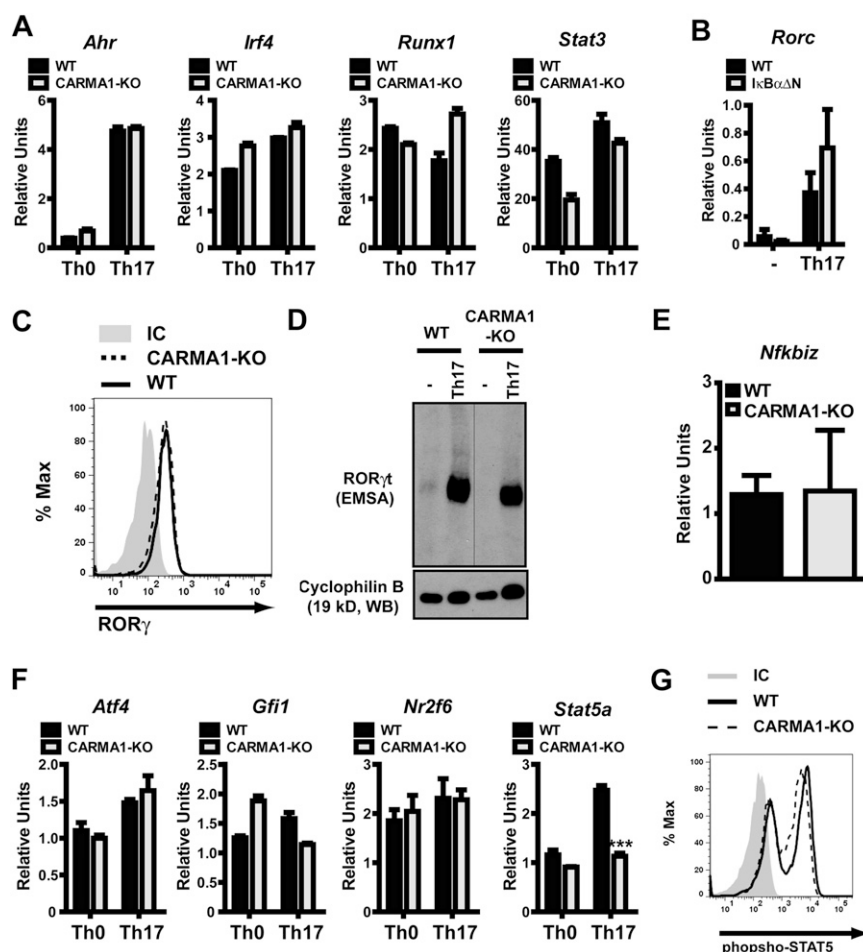

**Fig. S6.** CARMA1 and transcription factors controlling Th17 differentiation. (A) WT and CARMA1-KO CD4<sup>+</sup>CD25<sup>-</sup>CD44<sup>lo</sup> cells were stimulated in Th0 or Th17 conditions for 72 h, processed, and levels of *Ahr*, *Irf4*, *Runx1*, and *Stat3* mRNA were assessed by RT-qPCR and normalized to levels of *Actb* (relative units). Values displayed correspond to mean  $\pm$  SD of triplicates, and data are representative of at least three independent experiments. (B) WT and  $\kappa$ B $\alpha$ ΔN-Tg CD4<sup>+</sup>CD25<sup>-</sup>CD44<sup>lo</sup> cells were left unstimulated or stimulated for 72 h in Th17 conditions. Levels of *Rorc* mRNA were assessed by RT-qPCR as in A. (C) CD4<sup>+</sup>CD25<sup>-</sup>CD44<sup>lo</sup> WT (solid line) and CARMA1-KO (dashed line) cells were stimulated in Th17 conditions for 72 h and levels of ROR $\gamma$ t protein were assessed by intracellular flow cytometry. IC, isotype control (gray-filled histogram). Data are representative of at least three independent experiments. (D) Nuclear extracts were prepared from CD4<sup>+</sup>CD25<sup>-</sup>CD44<sup>lo</sup> WT and CARMA1-KO cells either unstimulated (–) or incubated in Th17 conditions for 72 h. ROR $\gamma$ t binding to the IL-17A promoter was analyzed by EMSA. Nuclear protein levels of cyclophilin B, detected by immunoblot, were used for normalization of nuclear protein content. (E) *Nfkbiz* mRNA was assessed in 72 h Th17-stimulated WT and CARMA1-KO cells as in A. (F) Cells were stimulated and processed as in A, and expression of *Atf4*, *Gfi1*, *Nr2f6*, and *Stat5a* mRNA was assessed by RT-qPCR as described in A. (G) STAT5 phosphorylation was assessed in WT and CARMA1-KO CD4 naïve cells stimulated in Th17 conditions for 18 h. \*\*\**P* < 0.001.

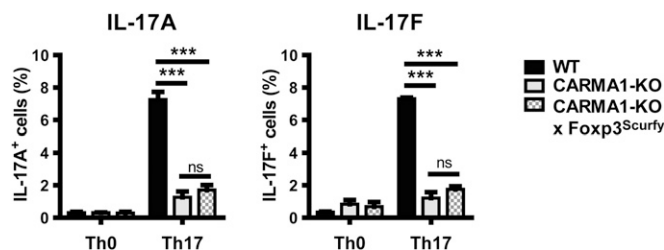

**Fig. S7.** Genetic ablation of *Foxp3* expression does not restore Th17 differentiation in CARMA1-KO T cells. IL-17A and IL-17F expression was assessed by intracellular flow cytometry in WT, CARMA1-KO, and CARMA1-KO  $\times$  *Foxp3*<sup>Scurfy</sup> naïve CD4 T cells stimulated for 72 h under Th0 or Th17 conditions. \*\*\**P* < 0.001. Values displayed correspond to mean  $\pm$  SD of triplicates, and data are representative of at least three independent experiments.

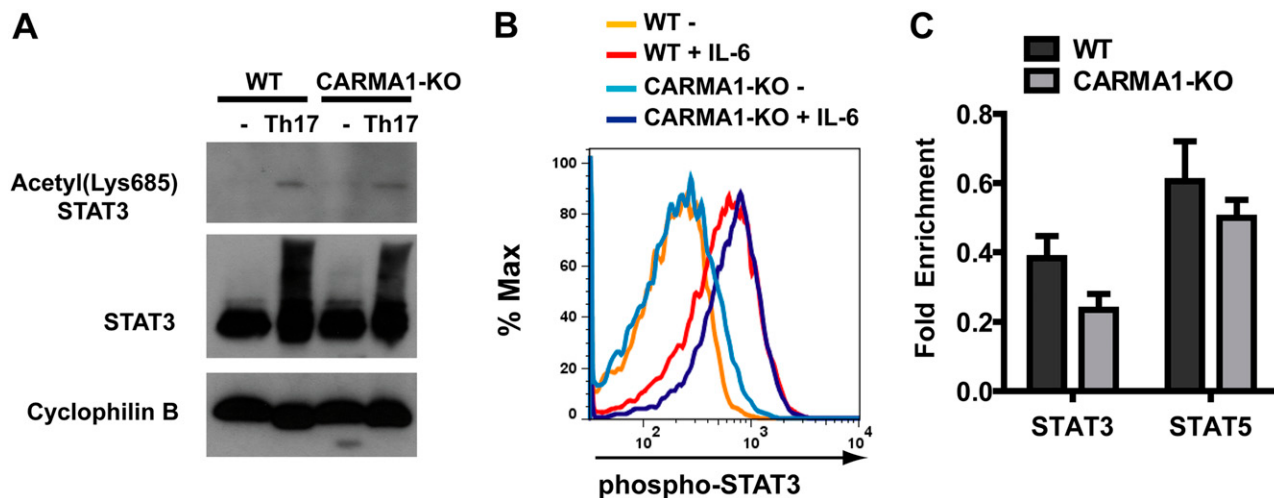

**Fig. S8.** STAT3 activation is CARMA1 independent. (A) Wild-type and CARMA1-KO CD4<sup>+</sup>CD25<sup>+</sup>CD44<sup>lo</sup> cells were left untreated (–) or stimulated in Th17 conditions for 72 h. Levels of STAT3 acetylation (lysine 685, *Top*) and total STAT3 (*Middle*) were assessed by Western blot. Cyclophilin B immunodetection (*Bottom*) was used as loading control. (B) STAT3 phosphorylation (tyrosine 705) was assessed by flow cytometry in wild-type or CARMA1-deficient CD4<sup>+</sup>CD25<sup>+</sup>CD44<sup>lo</sup> cells left unstimulated (–) or stimulated with IL-6 for 30 min. (C) WT and CARMA1-KO cells treated as in A were processed for chromatin immunoprecipitation using anti-STAT3 and anti-STAT5 Ab, with subsequent amplification of the *Il17a* promoter region. Data represent fold enrichment to isotype control IgG and are normalized to input DNA (mean  $\pm$  SD of triplicates). All data are representative of at least three independent experiments.

**Table S1. PCR oligonucleotides used in this study**

| 5' oligo        | Sequence                  | 3' oligo        | Sequence                   |
|-----------------|---------------------------|-----------------|----------------------------|
| <b>RT-qPCR</b>  |                           |                 |                            |
| Actin-F         | TGGAATCCTGTGGCATCCATGAAAG | Actin-R         | TAAACGCGAGCCTCAGTAACAGTCCG |
| AHR-F           | GGCCAAGAGCTTCTTTGATG      | AHR-R           | AAGACCAAGGCATCTGCTGT       |
| ATF4-F          | GAAACCTCATGGGTTCCTCA      | ATF4-R          | AGAGCTCATCTGGCATGGTT       |
| BCL-XL-F        | CAAGAGCCATTGAGTGAGGTGCT   | BCL-XL-R        | CAAGAGCCATTGAGTGAGGTGCT    |
| CCR6-F          | GGATAACCACTGAGGCAGGA      | CCR6-R          | AGTCCGAAAGACCCAGGATT       |
| Foxp3-F         | TCTTCGAGGAGCCAGAAGAG      | Foxp3-R         | TACTGGTGGCTACGATGCAG       |
| GFI1-F1         | CCCCGACTCTCAGCTTACC       | GFI1-R1         | AGAGAGCGGCACAGTGACTT       |
| IFNg-F          | GCGTCATTGAATCACACCTG      | IFNg-R          | ATCAGCAGCGACTCCTTTTC       |
| IL-17A-F        | TCCAGAAGGCCCTCAGACTA      | IL-17A-R        | AGCATCTTCTCGACCCTGAA       |
| IL-17F-R        | AAGAAGCAGCCATTGGAGAA      | IL-17F-F        | ACAGAAATGCCCTGGTTTGT       |
| IL-21-F         | AGGAGGGGAGGAAAGAAACA      | IL-21-R         | GGGAATCTTCTCGGATCCTC       |
| IL-22-F         | CAACTTCCAGCAGCCATACA      | IL-22-R         | GTTGAGCACCTGCTTCATCA       |
| IL-23R-F        | AAGGCTTTTCGGAACTCAT       | IL-23R-R        | TTCCAGGTGTCATGTCTATGT      |
| IL-4-F          | CCTCACAGCAACGAAGAACA      | IL-4-R          | ATCGAAAGGCCGAAAGAGT        |
| IRF4-F          | CAATGTCTCTGTACGTTTGG      | IRF4-R          | GGCTTCAGCAGACCTTATGC       |
| Nr2f6-F         | GGACAAGTCCAGTGGAAAGC      | Nr2f6-R         | GCACCTTCTTGAGCCGACAGT      |
| RORa-F          | TCTCCCTGCGCTCTCCGCAC      | RORa-R          | TCCACAGATCTTGCATTGA        |
| RORgT-F         | TGCAAGACTCATCGACAAGG      | RORgT-R         | GCACTGATGTTGAATCCCCCT      |
| Runx1-F         | CCAGCAAGCTGAGGAGCGGCG     | Runx1-R         | TGACGGTGACCAGAGTG          |
| STAT3-F1        | AGATCATGGATGCGACCAAC      | STAT3-R1        | GGCAGGTCAATGGTATTGCT       |
| STAT5a-F        | GTTGTATGGGCAGCATTTCC      | STAT5a-R        | TCAGCAAAAACCATCTTCC        |
| <b>ChIP</b>     |                           |                 |                            |
| IL-17-STAT-p2-F | CACCTCACACGAGGCACAAG      | IL-17-STAT-p2-R | ATGTTTGC GCGTCTCTGATC      |
| IL23r-Ach3-F    | CACATTCTGTAAGGAGACTCATCA  | IL23r-Ach3-R    | GGACAATAGAACAGGAGGAACATA   |
| RORg-Ach3-F     | GGGAGCCAAGTTCTCAGTCA      | RORg-Ach3-R     | GAGGCACGGTTTCCAAGATA       |
